# Supplementary material for: A stable and highly selective metalloporphyrin based framework for the catalytic oxidation of cyclohexene
Source: Royal Society of Chemistry journal article supplement (doi:10.1039/d0dt01420f), 2020-01-01
Supplement: d0dt01420f1.pdf [file d0dt01420f1.pdf]

## Supporting Information

### **A stable and highly selective metalloporphyrin based framework for catalytic oxidation of cyclohexene**

Zhinan Xia,<sup>a</sup> Fengyan Li,<sup>\*a,b</sup> Lin Xu<sup>a</sup> and Pingyun Feng<sup>\*b</sup>

<sup>a</sup>Key Laboratory of Polyoxometalate Science of Ministry of Education, Department of Chemistry, Northeast Normal University, Changchun, Jilin 130024, P. R. China. E-mail: lify525@nenu.edu.cn

<sup>b</sup>Department of Chemistry, University of California, Riverside, California 92521, USA. E-mail: pingyun.feng@ucr.edu

#### **Characterization techniques**

IR spectra were collected from KBr pellets on an Agilent Technologies Cary 630 FTIR spectrophotometer. Thermogravimetric analyses (TGA) were performed on a PerkinElmer TGA instrument heating from room temperature to 800°C in N<sub>2</sub> atmosphere at the rate of 10°C min<sup>-1</sup>. GC spectra were recorded on a Agilent Technologies 7820A. Powder X-ray diffraction (XRD) pattern for sample was recorded ranging from 5° to 40° at room temperature on a Siemens D5005 diffractometer with Cu-Kα ( $\lambda = 1.5418 \text{ \AA}$ ) radiation. X-ray photoelectron spectroscopy (XPS) was carried out on a USWHA150 photoelectron spectrometer using monochromatic Al Kα radiation as the excitation source. Morphology analyses was characterized by adopting a scanning electron microscope (Hitachi SU-8000 FE-SEM) equipped with an energy-dispersive X-ray (EDX) analyzer.

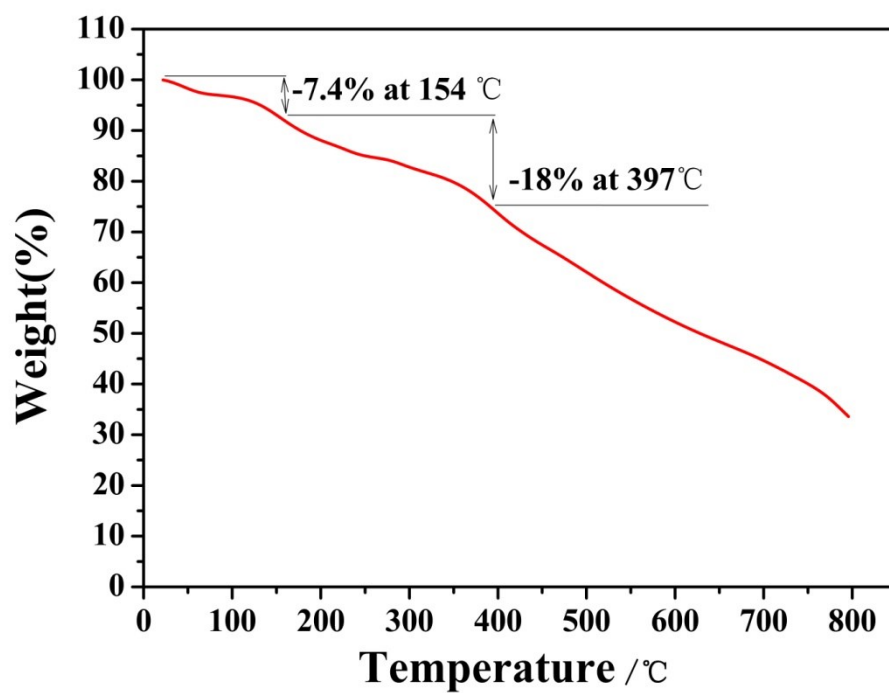

Fig. S1 TGA plots of the Mo<sub>2</sub>TCPP.

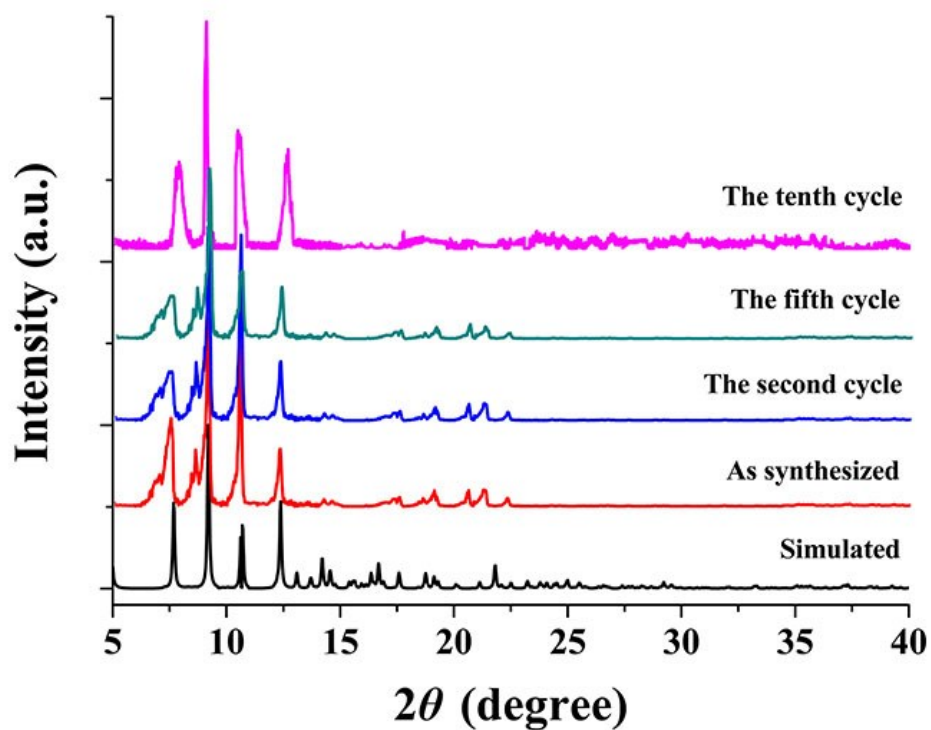

Fig. S2 The X-ray diffraction pattern of the catalyst Mo<sub>2</sub>TCPP after several cycles

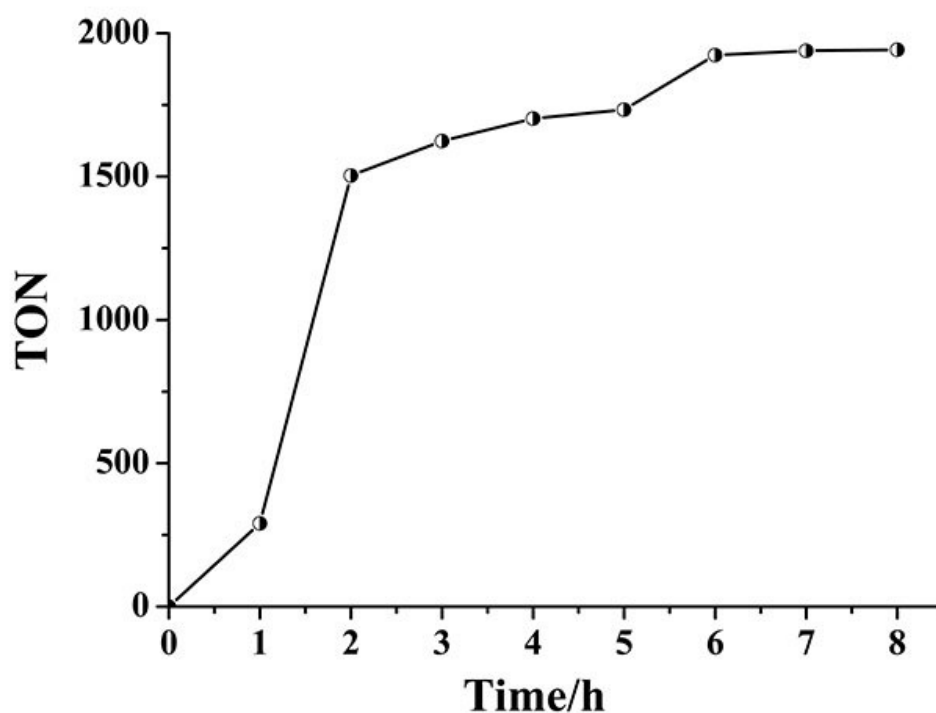

**Fig. S3** The catalyst turnovers in 8 hours.

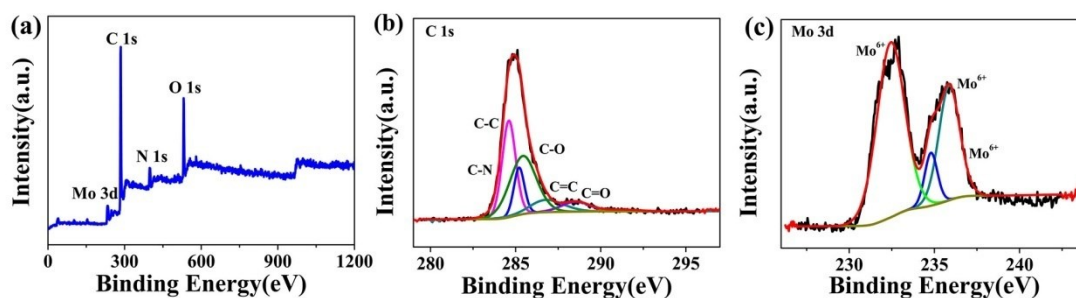

**Fig. S4** XPS analysis of  $\text{Mo}_2\text{TCPP}$ . (a) survey scan; (b) C 1s; (c) Mo 3d. the binding energies of C, N and O are 285eV, 398eV and 531eV, respectively, and the valence of the three elements are in common state. In Fig. 8c, the two strong peaks at 232.45eV and 235.8eV belong to Mo3d binding energies, so the valence state of Mo element is  $\text{Mo}^{6+}$ .

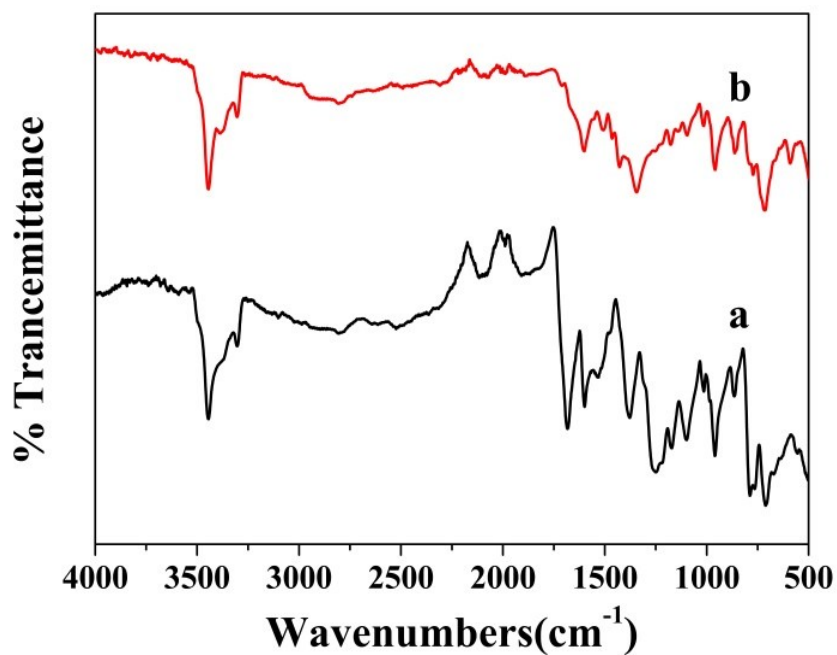

**Fig. S5** FTIR spectra of  $H_4TCPP$  (a) and  $Mo_2TCPP$  (b). The peaks at 865 and 590  $cm^{-1}$  are attributed to Mo-O vibration peaks in  $Mo_2TCPP$ . Because the coordination of metals to the ligands, the peak value in the spectrum shifts slightly compared to the TCPP ligands.

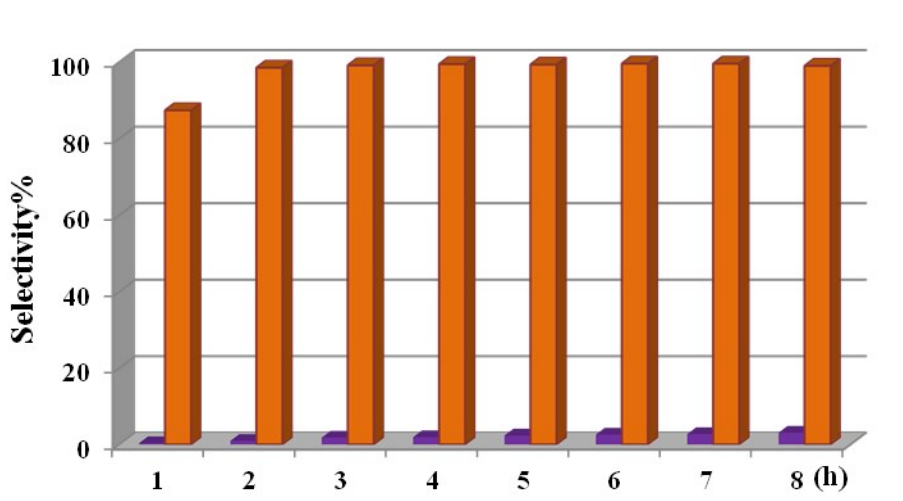

**Fig. S6**  $H_2O_2$  as oxidant, the selectivity of epoxycyclohexane after catalytic oxidation by TCPP (purple) and  $Mo_2TCPP$  (orange) at different time.

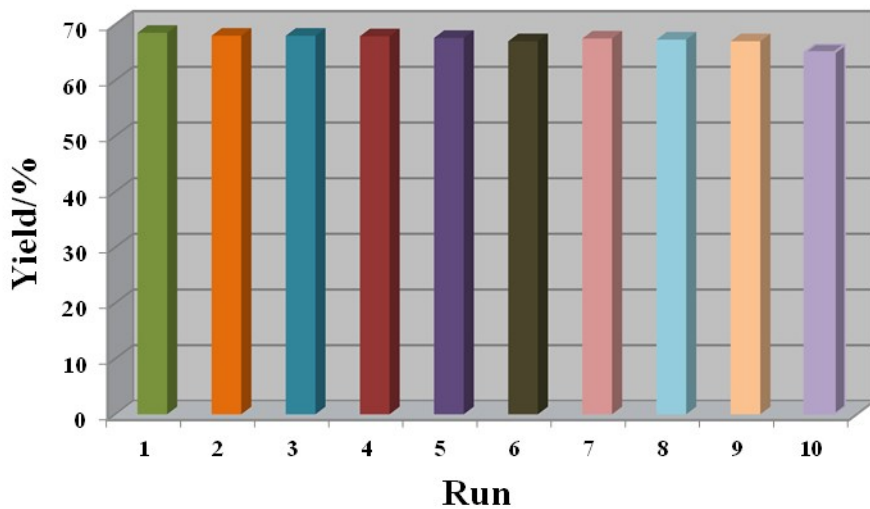

**Fig. S7** H<sub>2</sub>O<sub>2</sub> as oxidant, the productivity of epoxycyclohexane by Mo<sub>2</sub>TCPP with cyclohexene at different runs.

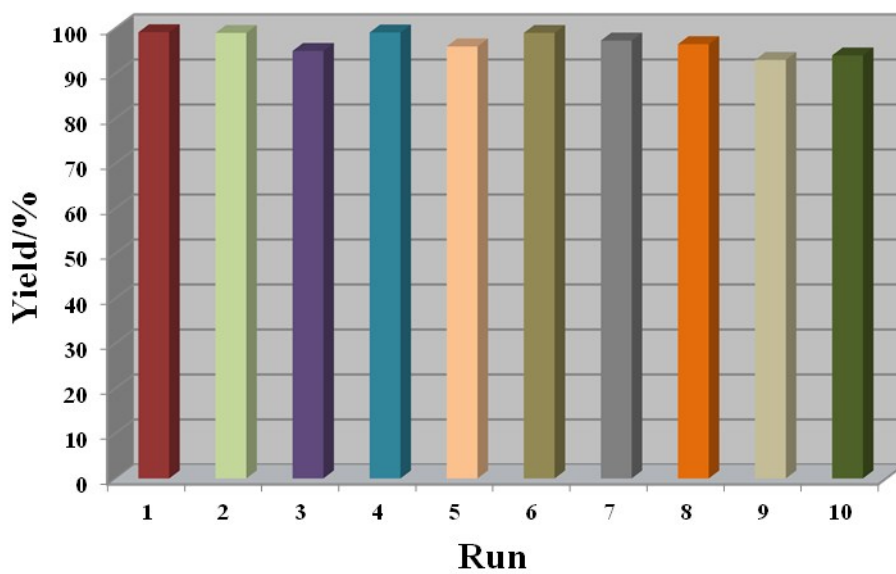

**Fig. S8** CHP as oxidant, the productivity of epoxycyclohexane by Mo<sub>2</sub>TCPP with cyclohexene at different runs.

Table S1 Crystal data and structure refinements.

| Compounds                                                                        | Mo <sub>2</sub> TCPP                                                           |
|----------------------------------------------------------------------------------|--------------------------------------------------------------------------------|
| <b>Empirical formula</b>                                                         | C <sub>54</sub> H <sub>59</sub> Mo <sub>2</sub> N <sub>7</sub> O <sub>19</sub> |
| <b>Formula weight</b>                                                            | 1325.77                                                                        |
| <b>Crystal system</b>                                                            | Orthorhombic                                                                   |
| <b>Space group</b>                                                               | <i>Pnma</i>                                                                    |
| <b><i>a</i> (Å)</b>                                                              | 24.2727(9)                                                                     |
| <b><i>b</i> (Å)</b>                                                              | 35.9510(13)                                                                    |
| <b><i>c</i> (Å)</b>                                                              | 7.6427(3)                                                                      |
| <b>Volume (Å<sup>3</sup>)</b>                                                    | 6669.2(4)                                                                      |
| <b><i>Z</i></b>                                                                  | 4                                                                              |
| <b><math>\rho</math> (g·cm<sup>-3</sup>)</b>                                     | 1.320                                                                          |
| <b>F(000)</b>                                                                    | 2360                                                                           |
| <b><math>\mu</math> (mm<sup>-1</sup>)</b>                                        | 0.433                                                                          |
| <b><i>R</i><sub>all</sub></b>                                                    | 0.0867                                                                         |
| <b>Data / parameters</b>                                                         | 2664/321                                                                       |
| <b>Goodness-of-fit on F<sup>2</sup></b>                                          | 1.014                                                                          |
| <b><i>R</i><sub>1</sub> (<i>wR</i><sub>2</sub>) [<i>I</i> &gt; 2σ(<i>I</i>)]</b> | 0.0778                                                                         |
| <b><i>R</i><sub>1</sub> (<i>wR</i><sub>2</sub>) (all data)</b>                   | 0.1952                                                                         |

**Table S2** Catalytic performance of different catalysts in the oxidation of cyclooctane with H<sub>2</sub>O<sub>2</sub><sup>a</sup>.

| Catalyst                         | Cyclooctane conversion (%) | Cyclooctanone yield (%) | Cyclooctane-1,4-dione yield (%) | Cyclooctanol yield(%) | Cyclooctane selectivity (%) |
|----------------------------------|----------------------------|-------------------------|---------------------------------|-----------------------|-----------------------------|
| None                             | 0                          | -                       | -                               | -                     | -                           |
| Na <sub>2</sub> MoO <sub>4</sub> | 0                          | -                       | -                               | -                     | -                           |
| H <sub>4</sub> TCPP              | 0                          | -                       | -                               | -                     | -                           |
| Mo <sub>2</sub> TCPP             | 68.6                       | 46                      | 14.4                            | 8.2                   | 67                          |

<sup>a</sup> Reaction conditions: 3 ml cyclooctane, 4ml H<sub>2</sub>O<sub>2</sub>, 80°C, 8 h and Mo<sub>2</sub>TCPP 0.02 g.

**Table S3** Catalytic performance of different catalysts in the oxidation of benzene with H<sub>2</sub>O<sub>2</sub><sup>b</sup>.

| Catalyst                         | Benzene conversion(%) | Phenol yield(%) | Quinones yield(%) | Phenol selectivity(%) |
|----------------------------------|-----------------------|-----------------|-------------------|-----------------------|
| None                             | 0                     | -               | -                 | -                     |
| Na <sub>2</sub> MoO <sub>4</sub> | 0                     | -               | -                 | -                     |
| H <sub>4</sub> TCPP              | 0                     | -               | -                 | -                     |
| Mo <sub>2</sub> TCPP             | 71                    | 47.9            | 23.1              | 67.5                  |

<sup>b</sup> Reaction conditions: 8mmol benzene, 3ml H<sub>2</sub>O<sub>2</sub>, 80°C, 8 h and Mo<sub>2</sub>TCPP 0.02 g.
